# Supplementary material for: Black tea polyphenols and polysaccharides improve body composition, increase fecal fatty acid, and regulate fat metabolism in high-fat diet-induced obese rats
Source: Royal Society of Chemistry journal article supplement (doi:10.1039/c6fo00401f), 2016-01-01
Supplement: c6fo00401f1.pdf [file c6fo00401f1.pdf]

## Supplementary Table and Figure

**Supplementary Table 1.** *Composition of diets fed to mice*

| Ingredient                            | High-Fat Diet |
|---------------------------------------|---------------|
| Casein                                | 23.31         |
| L-cystein                             | 0.35          |
| Corn starch                           | 8.48          |
| Maltodextrin                          | 11.65         |
| Sucrose                               | 20.14         |
| Cellulose                             | 5.83          |
| Yolk powder                           | 10            |
| Soybean oil                           | 2.91          |
| Lard                                  | 10            |
| Cholesterol                           | 0.5           |
| Cholate                               | 0.5           |
| Mineral Mix                           | 1.16          |
| Phosphate dicalcium                   | 1.51          |
| Carbonate calcium                     | 0.64          |
| Potassium citrate, 1 H <sub>2</sub> O | 1.92          |
| Vitamin Mix                           | 1.16          |
| Choline bitartrate                    | 0.23          |
| Total                                 | 99.97         |

**Supplementary Table 2.** Primer sequence used in RT-PCR Primer sequence

| Gene    | Sense primer        | Antiprimer(5' →3')   |
|---------|---------------------|----------------------|
| Aqp1    | CATTGGCTTGTCTGTGGC  | TTTGAGAAGTTGCGGGTG   |
| Dcn     | CGCATCTCAGACACCAAC  | AAGGGAGGCAGAAGTCAT   |
| Ugt2b   | TGGCATTCTCTGTTTGG   | GGGCTTCATAGGCTGGTC   |
| Cxcl13  | ATTCTGGAGACCCATTACA | AACCATCTGGCAGTAGGA   |
| Ppp1r3c | GTCTCAGCGTCAAGCAGG  | AAGGTCCAAGAGGTCAAAC  |
| Gck     | GTGGCAATGGTGAACGAC  | CCACTTGTGACACGAAACG  |
| Lpin2   | AAGACAAGATGCCGAAGA  | GAGAATCTGTCCCAAAGC   |
| Adh1    | TCCCTGTTACGCCTCTT   | CCACCGCTATGTCATCTACC |
| Sult1e1 | GATGTCGTCGTTTCTTAT  | ATTCTTACTCTTCTCCCAC  |
| Ccnb2   | GCAAACAGCCGAAACCTA  | GAAGCCTAAACTTGGAATGG |
| Ccna2   | TTAGGGAAATGGAGGTTA  | TAGTTCACAGCCAAATGC   |
| Rrm2    | TTGAGGAAGAGCCGTTAC  | CTAAATCGCTCCACCAAG   |
| Cpa1    | GAAGCAGTCTGTGGCAATG | ATCCAGCGTATGATAGGTG  |
| GADPH   | GCAAGTTCAACGGCACAG  | GCCAGTAGACTCCACGACAT |

**Supplementary Table 3.** Differently expressed genes in liver and epididymal adipose tissues

|                       | <b>Accession No.</b> | <b>Gene</b>                                                       |
|-----------------------|----------------------|-------------------------------------------------------------------|
| <b>Up-regulated</b>   | AA891661             | Aqp1: aquaporin 1                                                 |
|                       | BM390253             | Dcn: decorin                                                      |
|                       | AA858993             | Ugt2b: UDP glycosyltransferase 2 family, polypeptide B            |
|                       | BM390827             | Ppp1r3c: protein phosphatase 1, regulatory (inhibitor) subunit 3C |
|                       | NM_012565            | Gck: glucokinase                                                  |
|                       | NM_130780            | Adh1: alcohol dehydrogenase 1 (class I)                           |
|                       | NM_012883            | Sult1e1:sulfotransferase family 1E, estrogen-preferring, member 1 |
|                       | NM_016998            | Cpa1: carboxypeptidase A1                                         |
| <b>Down-regulated</b> | AA892854             | Cxcl13: chemokine (C-X-C motif) ligand 13                         |
|                       | BE096055             | Lpin2: lipin 2                                                    |
|                       | AW253821             | Ccnb2: cyclin B2                                                  |
|                       | AA998516             | Ccna2: cyclin A2                                                  |
|                       | BG379338             | Rrm2: ribonucleotide reductase M2                                 |

## Supplementary Figure 1.

**A**

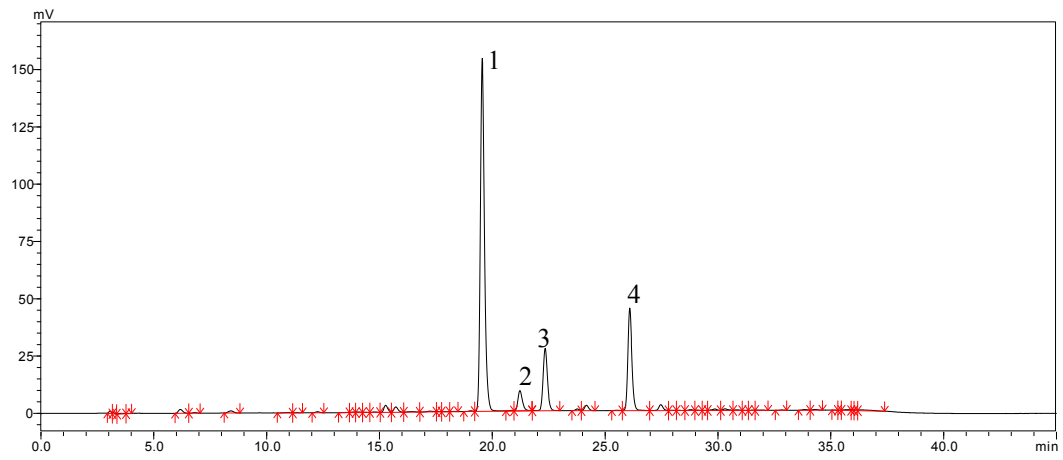

**B**

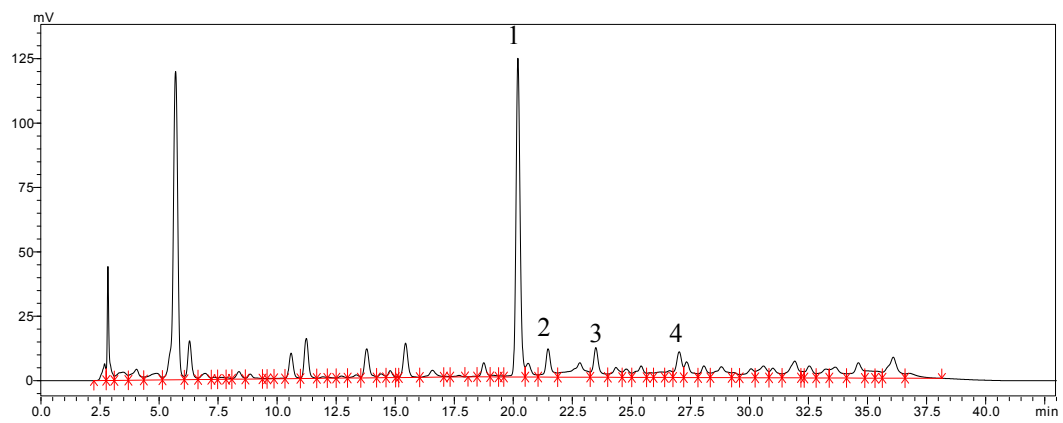

**Supplementary Figure 1.** HPLC Chromatogram of tea polyphenols standard substance (A), black tea polyphenols extractive (B). Peak 1 represents EGC, peak 2 represents EC, peak 3 represents EGCG and peak 4 represents ECG.

**Supplementary Figure 2.**

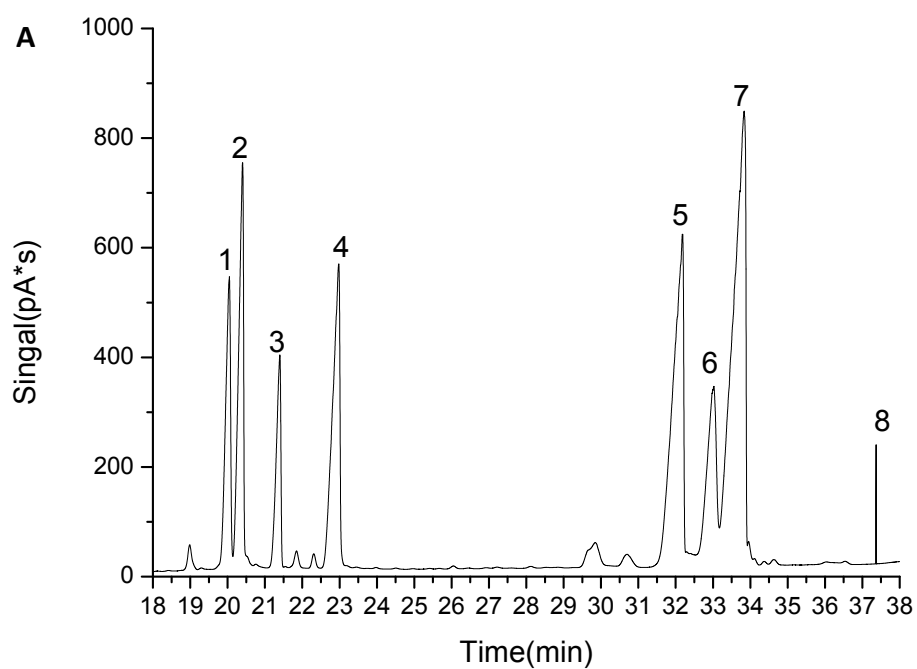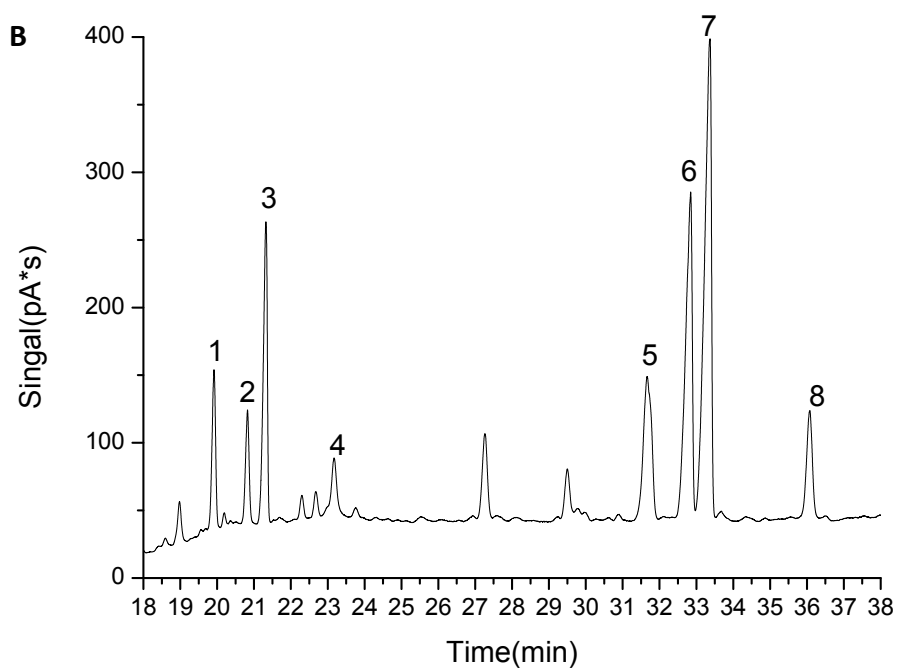

**Supplementary Figure 2.** GC Chromatogram of monosaccharide standard substance (A), black tea polysaccharide extractive (B). Peak 1 represents Rhammose, peak 2 represents Fucose, peak 3 represents Arabinose, peak 4 represents Xylose, peak 5 represents Mannose, peak 6 represents Galactose, peak 7 represents Galactose and peak 8 represents Inositol.

**Supplementary Figure 3.**

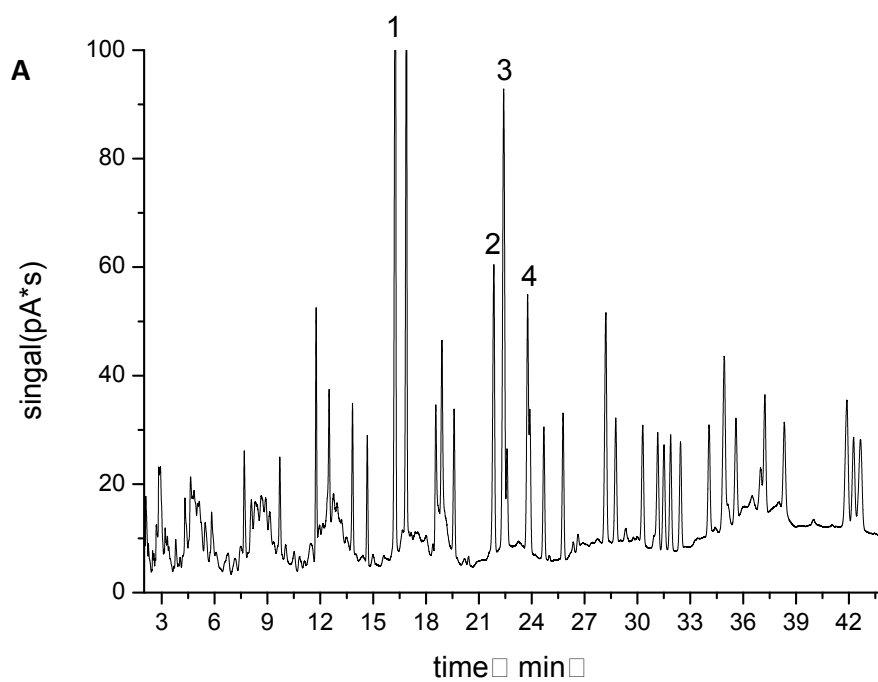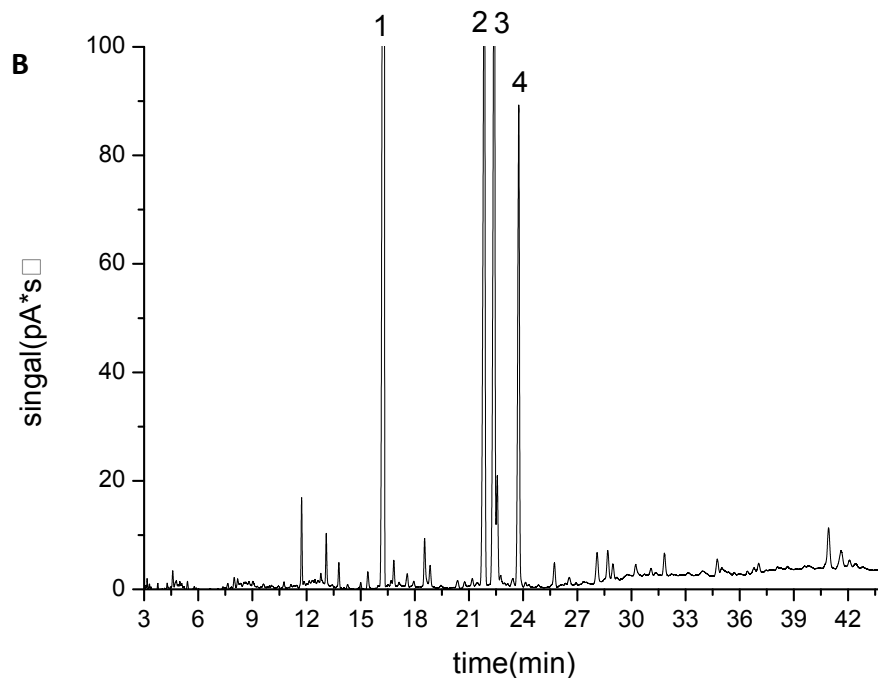

**Supplementary Figure 3.** GC Chromatogram of fatty acid standard substance (A), SD rats fecal lipids (B). Peak 1 represents palmitic acid, peak 2 represents stearic acid, peak 3 represents oleic acid, peak 4 represents linoleic acid.



Supplementary Figure 5.

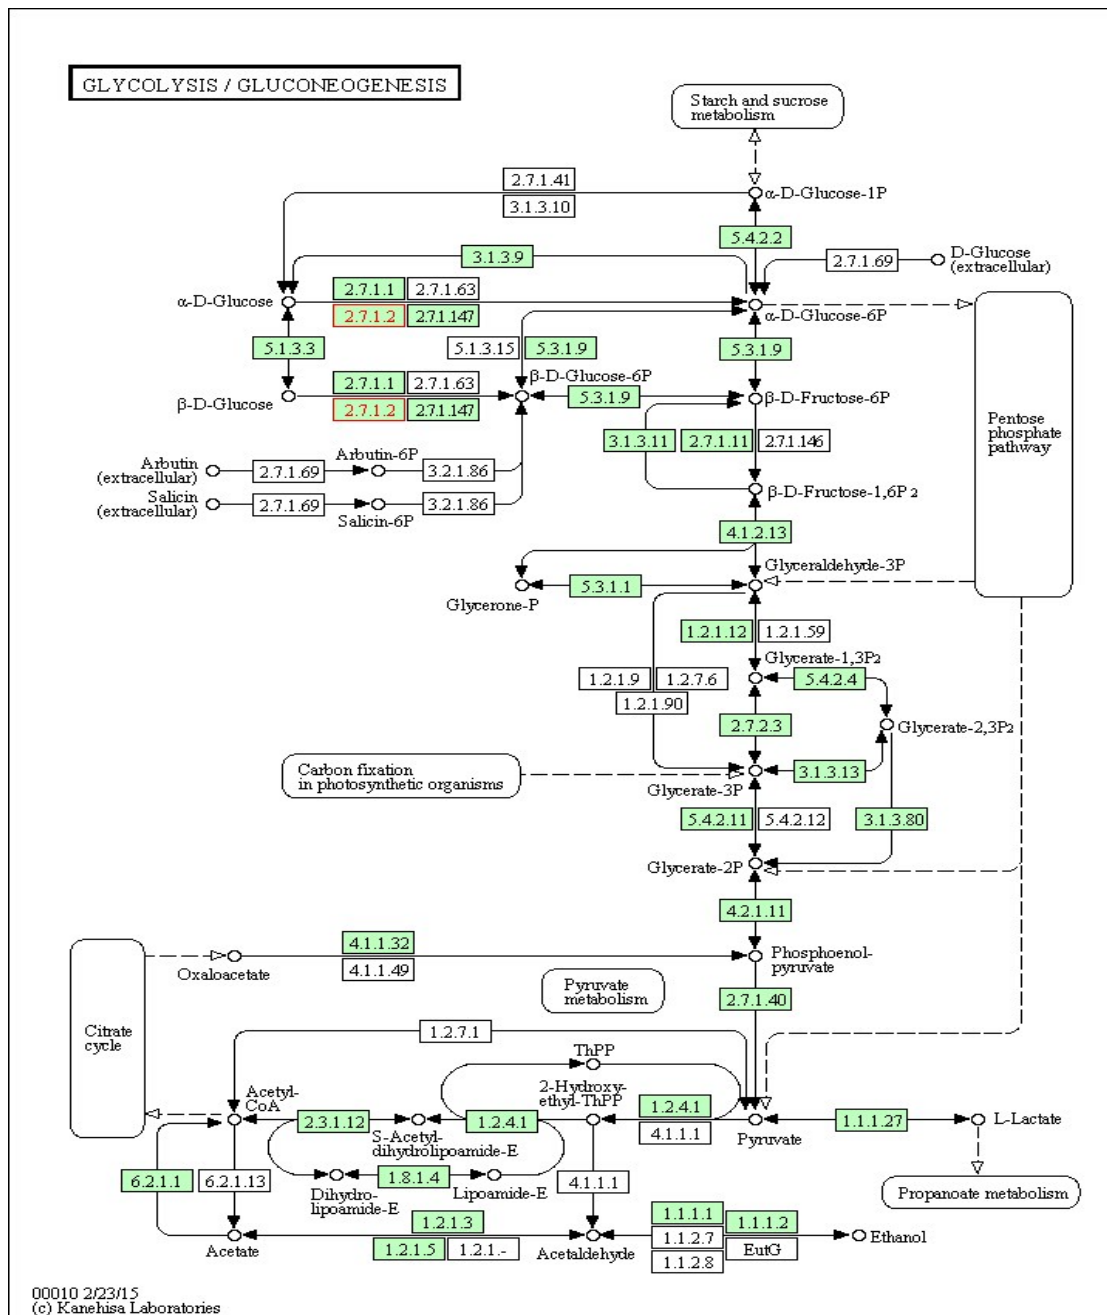

Supplementary Figure 5. Glucolysis/Gluconeogenesis pathway



Supplementary Figure 6.

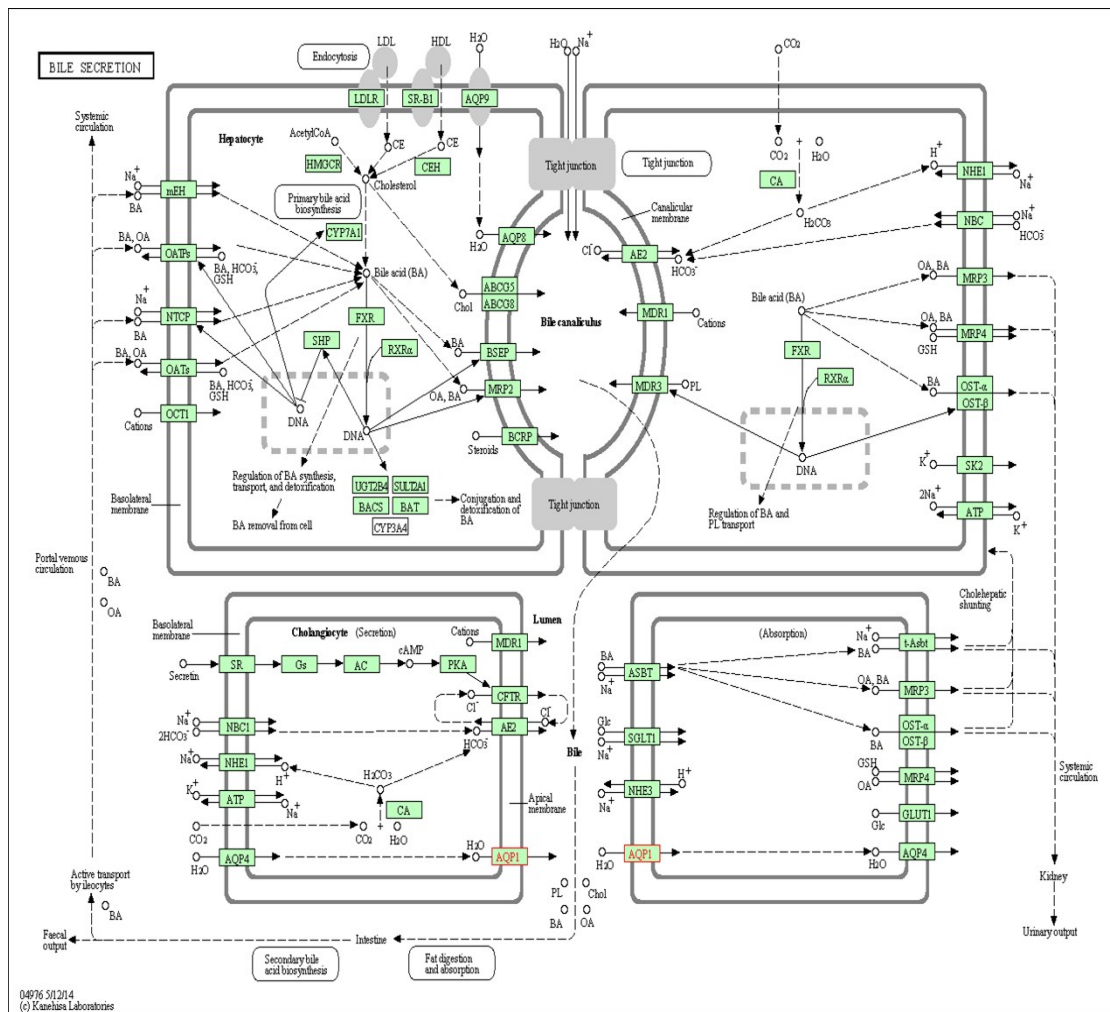

Supplementary Figure 6. Bile secretion pathway



**Supplementary Figure 8. Insulin signaling pathway**

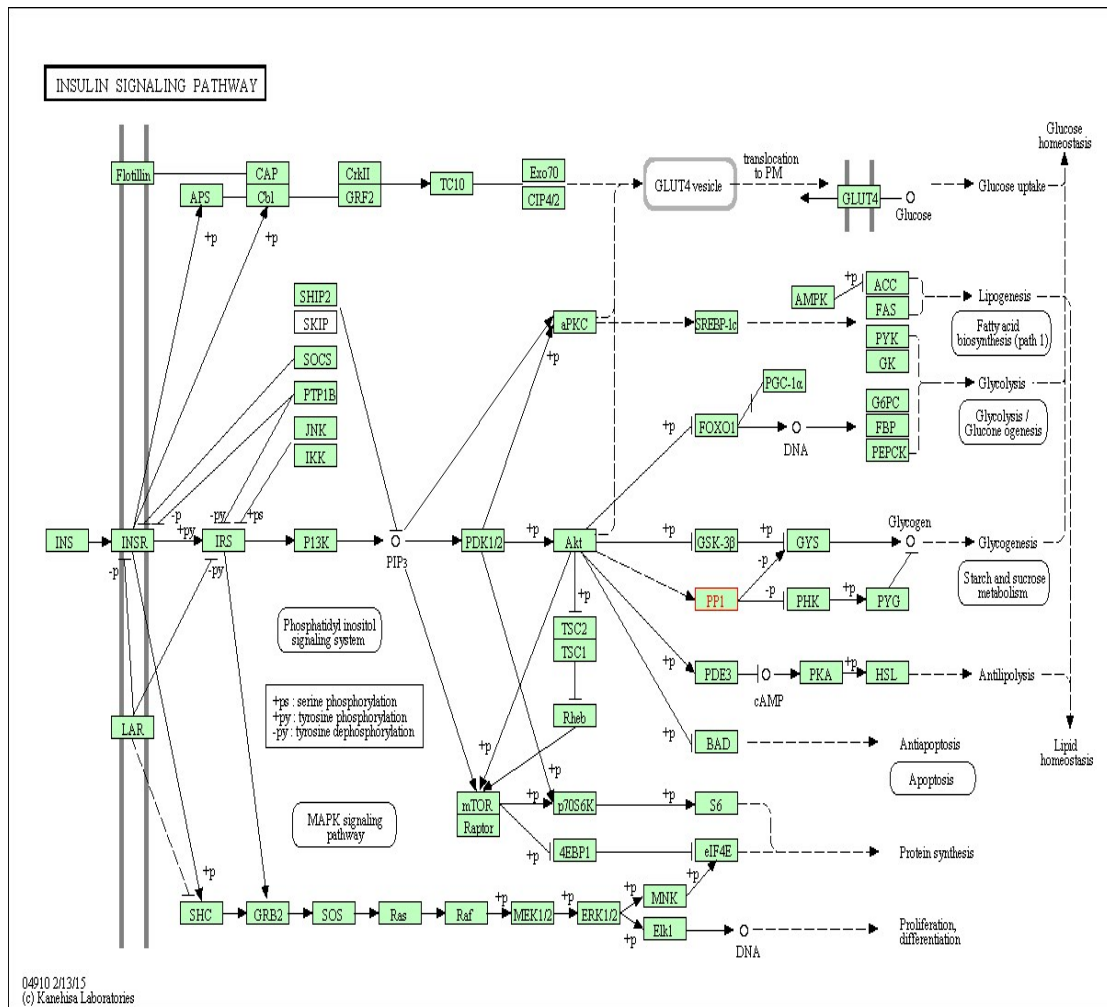

**Supplementary Figure 8. Insulin signaling pathway**
